# Supplementary material for: Studies on the mechanism of the reaction between 5′-deoxyadenosylcobinamide and cyanide
Source: Royal Society of Chemistry journal article supplement (doi:10.1039/b109292h), 2002-01-01
Supplement: b109292h.doc [file b109292h.doc]

**Supporting Information**

Figure A

Plot of absorbance at 367 nm versus time for the reaction between AdoCbi+ (~1 x 10-4 M, 0.100 M CAPS, pH 11.0, I = 1.0 M (NaClO4)) and NaCN (0.200 M, 0.100 M CAPS, pH 11.0, I = 1.0 M (NaClO4)). The data has been fitted to a single first-order rate equation, giving kobs = (9.76  0.01) x 10-3 s-1. The residuals of the fit are shown above.

Figure B

Plot of observed rate constant (kobs) versus CN- concentration for the reaction between AdoCbiOH and CN- ([AdoCbiOH] ~1 x 10-4 M, H2O, 0.100 M CAPS, pH 11.0  0.1, 25.0 C) at [NaCN] = 4.00 x 10-2 - 1.90 M, I = 2.0 M (NaClO4).

Figure C

Plot of 1/kobs versus 1/[CN-] for the data given in Figure B. The line represents the best fit of the data at the five lowest CN- concentrations to eqtn (3), giving k2 = (2.55  0.03) x 10-2 s-1 and KCN = 4.6  0.2 M-1.

Figure D

Plot of 1H NMR chemical shift versus [CN-] for the corrin C10 signal of AdoCbiOH (D2O, 0.100 M CAPS, pD 11.0, 25.0 C, I = 2.0 M (NaClO4)). The data has been fitted to eqtn (6) in the text, giving KCN’ = 3.29  0.05 M-1 and AdoCNCbi = 5.6  0.2 ppm.

Figure E

Plot of observed rate constant (kobs) versus CN- concentration for the reaction between AdoCbiOH and CN- at 25.0 C ([AdoCbi+] ~1 x 10-4 M, [NaCN] = 4.00 x 10-2 - 0.900 M, D2O, 0.100 M CAPS, pD 11.0, I = 1.0 M (NaClO4)).

Figure F

Plot of observed rate constant (kobs) versus CN- concentration for the reaction between AdoCbiOH and CN- at 25.0 C ([AdoCbi+] ~1 x 10-4 M, [NaCN] = 4.00 x 10-2 - 1.90 M, D2O, 0.100 M CAPS, pD 11.0, I = 2.0 M (NaClO4)).

Figure G

Plot of 1/kobs versus 1/[CN-] for the reaction between AdoCbiOH and CN- in D2O, 0.100 M CAPS, pD 11.0, 25.0 C at [NaCN] = 4.00 x 10-2-0.900 M, I = 1.0 M (NaClO4). The line represents the best fit of the data at the five lowest CN- concentrations to eqtn (3), giving k2 = (2.17  0.08) x 10-2 s-1 and KCN = 6.9  0.4 M-1 at I = 1.0 M.

Figure H

Plot of 1/kobs versus 1/[CN-] for the reaction between AdoCbiOH and CN- in D2O, 0.100 M CAPS, pD 11.0, 25.0 C at [NaCN] = 4.00 x 10-2-1.90 M, I = 2.0 M (NaClO4). The line represents the best fit of the data at the five lowest CN- concentrations to eqtn (3), giving k2 = (2.45  0.04) x 10-2 s-1 and KCN = 3.8  0.1 M-1, at I = 2.0 M.

Figure I

Eyring plot of ln(k2/T) versus 1/T for the reaction between AdoCbiOH and NaCN (H2O, 0.100 M CAPS, pH 11.0, I = 1.0 M (NaClO4)). The activation parameters H‡ = 53  4 kJ mol-1 and S‡ = -97  14 J mol-1 K-1 were calculated from the slope and intercept, respectively.

Figure J

Plot of 1/kobs versus 1/[CN-] for the data given in Figure C. The fitted line assumes that KCN (eqtn (1)) = KCN (eqtn (5)) and represents the best fit of the data at the lowest five CN- concentrations. Fixing KCN = 5.7 M-1 gives k2 = (2.50  0.02) x 10-2 s-1.

Figure K

Plot of 1/kobs versus 1/[CN-] for the data given in Figure D. The fitted line assumes that KCN (eqtn (1)) = KCN (eqtn (5)) and represents the best fit of the data at the lowest five CN- concentrations. Fixing KCN = 3.29 M-1 gives k2 = (2.72  0.01) x 10-2 s-1.

**The Assumption 1<< KCo is valid in 92% DMF/8% D2O:**

In our earlier paper3b rate and equilibrium constants were obtained for the reaction between AdoCbl and (TBA)CN in 92% DMF/8% D2O and the data was fitted the proposed mechanism

(i)

from which the rate equation

kobs = k2KCN[CN-]/(1 + KCo + KCN[CN-]) (ii)

= k2(KCN/KCo)[CN-]/(1 + (KCN/KCo)[CN-]) (assuming 1  KCo) (iii)

was obtained. The assumption 1  KCo is valid in aqueous solution (KCo = 76.6, 25 C 8). UV-visible spectra of AdoCbl and AdoCbi+ in aqueous solution and 92% DMF/8% D2O also indicate that the assumption is valid in 92% DMF/8% D2O. Figure L gives UV-visible spectra of AdoCbi+ and AdoCbl in D2O and 92% DMF/8% D2O. From this figure it can be seen that the spectra of (base-off) AdoCbi+ in D2O (c) and 92% DMF/8% D2O (d) are almost identical. The wavelength maxima at 460  1 nm found in both these spectra is typical for base-off cobamides.1c The spectra of AdoCbl in D2O (a) and 92% DMF/8% D2O (b) are slightly different, however (max at 525 and 520 nm, respectively). Assuming that AdoCbl is essentially all in its base-off form in D2O, then the percentage of base-off AdoCbl in 92% DMF/8% D2O can be estimated from (525-520)/(525-460) x 100 = 8%. From this, a KCo value ~12 can be calculated, which is significantly larger than 1, so that the assumption 1  KCo is valid in 92% DMF/8% D2O.

Figure L

UV-visible spectra of AdoCbl in D2O (a) and 92% DMF/8% D2O (b), and AdoCbiOH in D2O (c) and 92% DMF/8% D2O (d).
